# Supplementary material for: Synthesis and molecular structure of enantiomerically pure pentadienyl complexes of the rare-earth metals
Source: Royal Society of Chemistry journal article supplement (doi:10.1039/c9dt01721f), 2019-01-01
Supplement: c9dt01721f1.pdf [file c9dt01721f1.pdf]

## Electronic Supplementary Information

# Synthesis and molecular structure of enantiomerically pure pentadienyl complexes of the rare-earth metals

Ann Christin Fecker,<sup>a</sup> Matthias Freytag,<sup>a</sup> Peter G. Jones<sup>a</sup> and Marc D. Walter<sup>a\*</sup>

<sup>a</sup> *Institut für Anorganische und Analytische Chemie, Technische Universität Braunschweig, Hagenring  
30, 38106 Braunschweig, Germany*

### Table of content

|                               |    |
|-------------------------------|----|
| 1. Crystallographic Details   | S2 |
| 2. <sup>1</sup> H NMR Studies | S4 |

# 1. Crystallographic details

**Table S1.** Crystallographic data.

| Compound reference                                                            | 1-La                               | 1-Ce                                                  | 1-Pr                               | 1-Nd                                                  |
|-------------------------------------------------------------------------------|------------------------------------|-------------------------------------------------------|------------------------------------|-------------------------------------------------------|
| Chemical formula                                                              | C <sub>39</sub> H <sub>57</sub> La | C <sub>39</sub> H <sub>57</sub> Ce                    | C <sub>39</sub> H <sub>57</sub> Pr | C <sub>39</sub> H <sub>57</sub> Nd                    |
| Formula Mass                                                                  | 664.75                             | 665.96                                                | 666.75                             | 670.08                                                |
| Crystal system                                                                | monoclinic                         | orthorhombic                                          | monoclinic                         | orthorhombic                                          |
| <i>a</i> /Å                                                                   | 9.5001(6)                          | 9.9249(3)                                             | 9.4762(3)                          | 9.9037(4)                                             |
| <i>b</i> /Å                                                                   | 18.0623(18)                        | 12.3230(4)                                            | 18.0442(7)                         | 12.3136(7)                                            |
| <i>c</i> /Å                                                                   | 19.7718(15)                        | 27.7491(10)                                           | 19.7324(7)                         | 27.6207(12)                                           |
| <i>α</i> /°                                                                   | 90                                 | 90                                                    | 90                                 | 90                                                    |
| <i>β</i> /°                                                                   | 97.105(6)                          | 90                                                    | 97.142(3)°                         | 90                                                    |
| <i>γ</i> /°                                                                   | 90                                 | 90                                                    | 90                                 | 90                                                    |
| Unit cell volume/Å <sup>3</sup>                                               | 3366.7(5)                          | 3393.84(19)                                           | 3347.9(2)                          | 3368.4(3)                                             |
| Temperature/K                                                                 | 100(2)                             | 100(2)                                                | 100(2)                             | 100(2)                                                |
| Space group                                                                   | <i>P</i> 2 <sub>1</sub>            | <i>P</i> 2 <sub>1</sub> 2 <sub>1</sub> 2 <sub>1</sub> | <i>P</i> 2 <sub>1</sub>            | <i>P</i> 2 <sub>1</sub> 2 <sub>1</sub> 2 <sub>1</sub> |
| No. of formula units per unit cell, <i>Z</i>                                  | 4                                  | 4                                                     | 4                                  | 4                                                     |
| Radiation type                                                                | Mo Kα                              | Mo Kα                                                 | Mo Kα                              | Mo Kα                                                 |
| Absorption coefficient, μ/mm <sup>-1</sup>                                    | 1.293                              | 1.365                                                 | 1.480                              | 1.566                                                 |
| No. of reflections measured                                                   | 144004                             | 89141                                                 | 154014                             | 65007                                                 |
| No. of independent reflections                                                | 13782                              | 9808                                                  | 19885                              | 9665                                                  |
| <i>R</i> <sub>int</sub>                                                       | 0.1899                             | 0.0678                                                | 0.0997                             | 0.1079                                                |
| Final <i>R</i> <sub>1</sub> values ( <i>I</i> > 2σ( <i>I</i> ))               | 0.0519                             | 0.0344                                                | 0.0392                             | 0.0418                                                |
| Final <i>wR</i> ( <i>F</i> <sup>2</sup> ) values ( <i>I</i> > 2σ( <i>I</i> )) | 0.0698                             | 0.0742                                                | 0.0629                             | 0.0625                                                |
| Final <i>R</i> <sub>1</sub> values (all data)                                 | 0.0789                             | 0.0397                                                | 0.0578                             | 0.0588                                                |
| Final <i>wR</i> ( <i>F</i> <sup>2</sup> ) values (all data)                   | 0.0845                             | 0.0764                                                | 0.0689                             | 0.0689                                                |
| Goodness of fit on <i>F</i> <sup>2</sup>                                      | 1.020                              | 1.183                                                 | 1.031                              | 1.052                                                 |
| Flack parameter                                                               | -0.014(11)                         | -0.031(6)                                             | -0.035(5)                          | -0.027(10)                                            |
| Δρ / e Å <sup>-3</sup>                                                        | 1.115/-0.649                       | 2.087/-0.912                                          | 0.999/-0.767                       | 1.314/-1.016                                          |

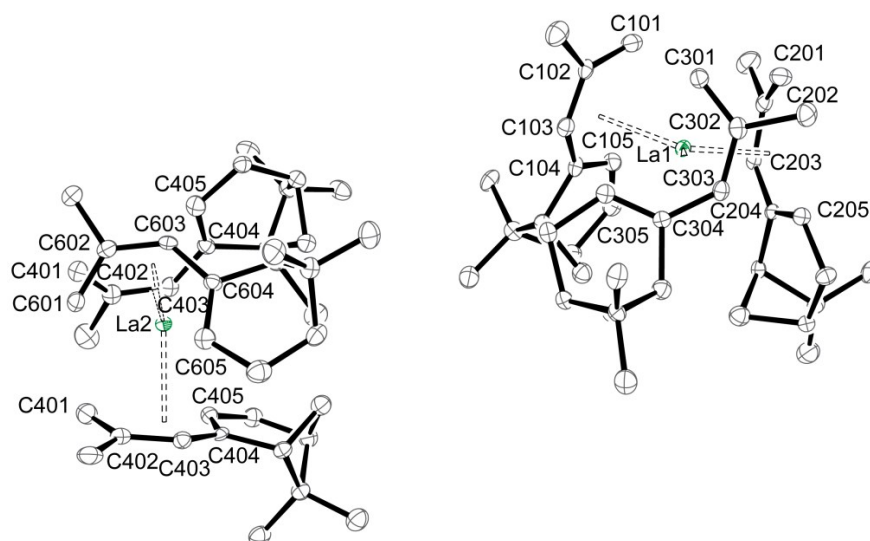

**Figure S1.** Molecular structure of **1-La** with two independent molecules in the asymmetric unit. Thermal ellipsoids are drawn at the 50% probability level.

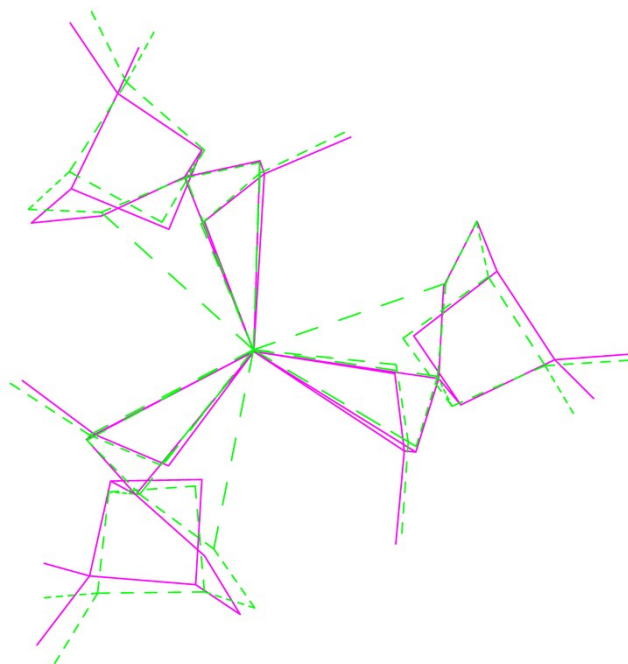

**Figure S2.** Least-squares fit of the two independent molecules of **1-La**. Molecule 1 is drawn in violet and molecule 2 in green.

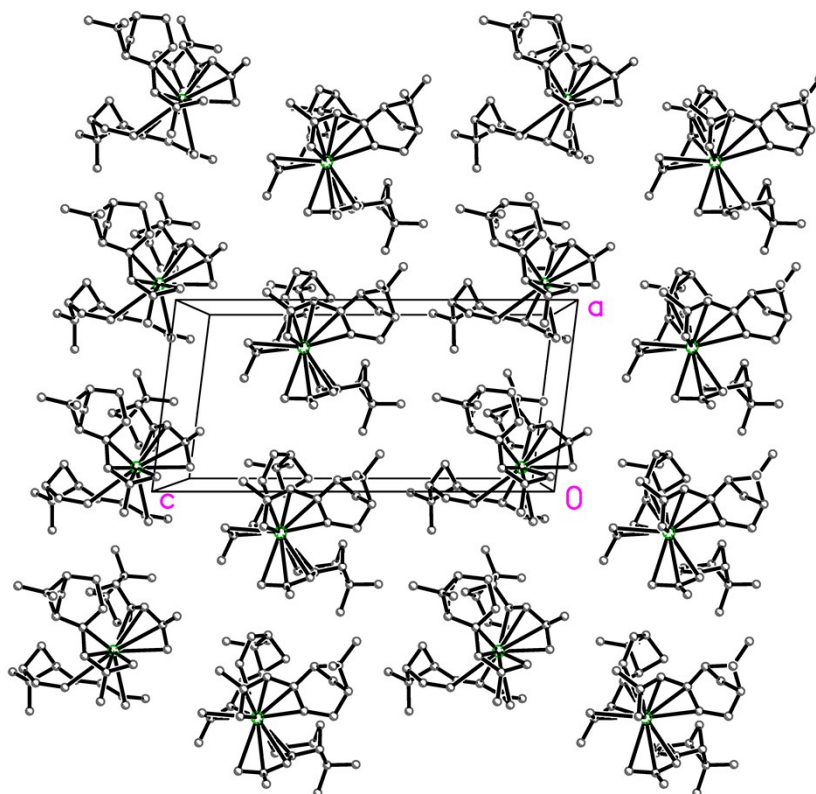

**Figure S3.** Packing diagram of **1-La** showing the formation of a hexagonal layer of molecules parallel to the *ac* plane at  $y \approx 1/4$ . From left to right, the vertical rows are alternately composed of molecules 2 and 1 in that order. The orthorhombic derivatives display no simple packing patterns.

## 2. $^1\text{H}$ NMR Studies

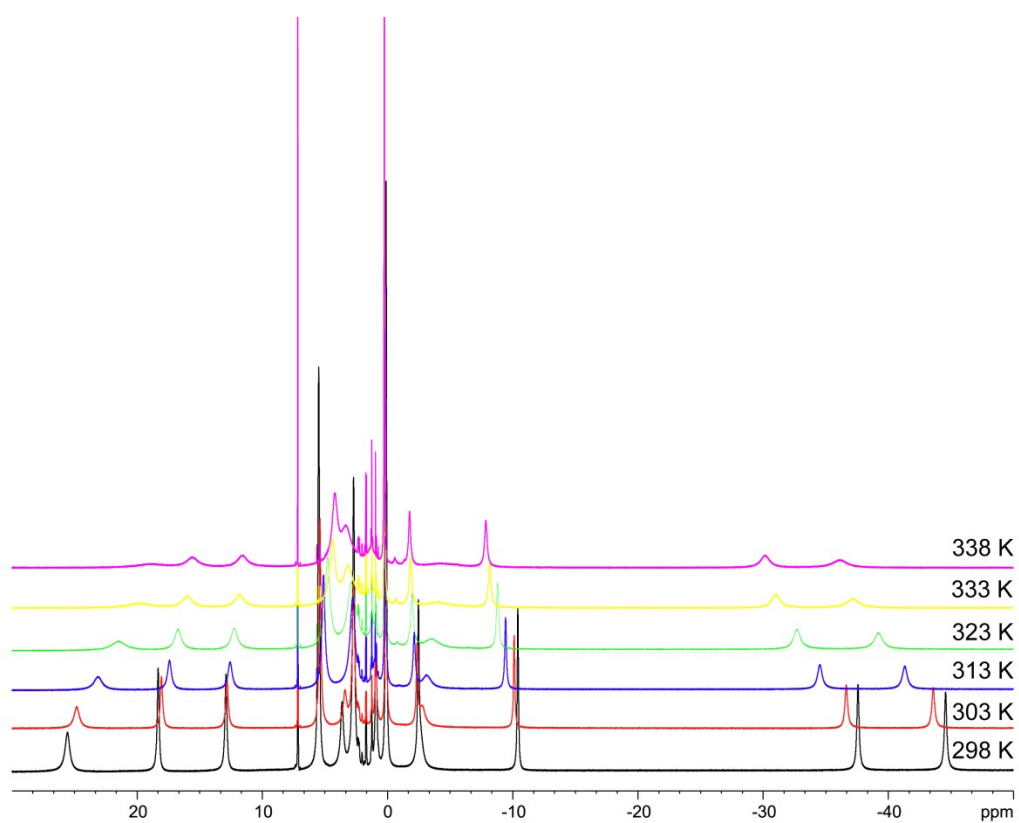

**Figure S4.** Variable temperature (VT)  $^1\text{H}$  NMR spectra for **1-Nd** recorded in  $\text{C}_6\text{D}_6$  between  $T = 298$  K and 338 K.

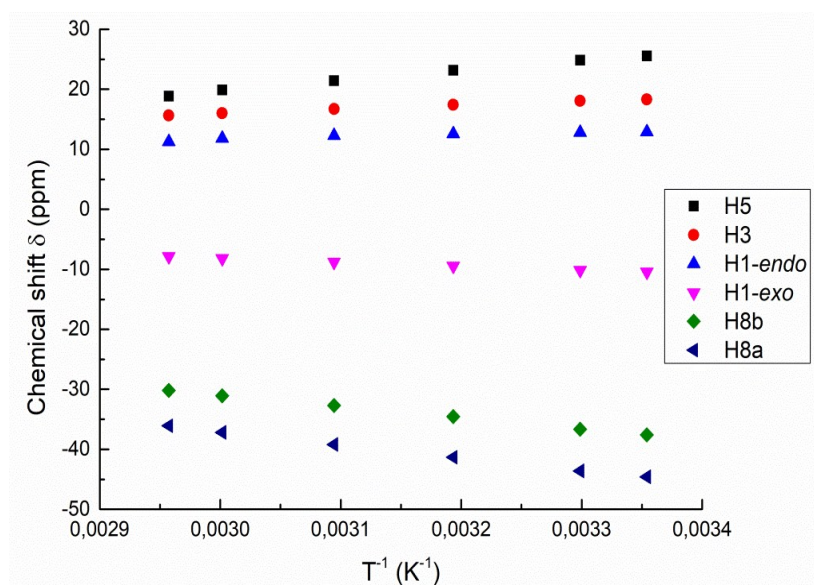

**Figure S5.**  $\delta$  vs.  $T^{-1}$  plot for selected  $^1\text{H}$  NMR resonances of **1-Nd** recorded in  $\text{C}_6\text{D}_6$  between  $T = 298$  K and 338 K (assignments according to Table S2).

**Table S2.** Correlation between  $G(r,\theta)$  and  $\delta^{\text{para}}$ .

|         | 1-Ce     |                       |                            |                           | 1-Pr     |                       |                            |                           | 1-Nd     |                       |                            |                           |
|---------|----------|-----------------------|----------------------------|---------------------------|----------|-----------------------|----------------------------|---------------------------|----------|-----------------------|----------------------------|---------------------------|
|         | $\delta$ | $\delta^{\text{dia}}$ | $\delta^{\text{para [a]}}$ | $G(r, \theta) \cdot 10^8$ | $\delta$ | $\delta^{\text{dia}}$ | $\delta^{\text{para [a]}}$ | $G(r, \theta) \cdot 10^8$ | $\delta$ | $\delta^{\text{dia}}$ | $\delta^{\text{para [a]}}$ | $G(r, \theta) \cdot 10^8$ |
| H8a     | -25,4    | 1,08                  | -26,48                     | -25,4                     | -64,9    | 1,08                  | -65,98                     | -35,3                     | -44,6    | 1,08                  | H5                         | -29,8                     |
| H1-exo  | -20,2    | 4,04                  | -24,24                     | -20,2                     | -57,5    | 4,04                  | -61,14                     | -25,5                     | -37,6    | 4,04                  | -41,64                     | -22,9                     |
| H8b     | -6,1     | 2,33                  | -8,43                      | -6,1                      | -18,5    | 2,33                  | -20,83                     | -12,4                     | -10,4    | 2,33                  | -12,73                     | -9,3                      |
| H6a     | -0,6     | 2,4                   | -3                         | -0,6                      | -4,9     | 2,4                   | -7,3                       | -3,1                      | -2,5     | 2,4                   | -4,9                       | -7,3                      |
| H7      | 1,3      | 2,04                  | -0,74                      | -0,3                      | 0,7      | 2,04                  | -2,84                      | -1,4                      | -2,5     | 2,04                  | -4,54                      | -4,1                      |
| H13 [b] | 0,3      | 1,89                  | -1,59                      | -1,3                      | -0,8     | 1,89                  | -1,19                      | -0,3                      | 0,1      | 1,89                  | -1,79                      | -0,9                      |
| H12 [b] | 2,1      | 1,25                  | 0,85                       | -2,1                      | 2,5      | 1,25                  | 1,25                       | 2,7                       | 2,7      | 1,25                  | 1,45                       | -0,6                      |
| H9      | 3,5      | 2,25                  | 1,25                       | 3,5                       | 8        | 2,25                  | 5,75                       | 2,9                       | 2,7      | 2,25                  | 0,45                       | 1,2                       |
| H6b     | 4,2      | 2,67                  | 1,53                       | 3,7                       | 6,1      | 2,67                  | 3,43                       | 3,8                       | 3,6      | 2,67                  | 0,93                       | 1,5                       |
| H11 [b] | 3,7      | 1,05                  | 2,65                       | 4,2                       | 9,8      | 1,05                  | 8,75                       | 3,9                       | 5,5      | 1,05                  | 4,45                       | 1,5                       |
| H1-endo | 6,6      | 2,65                  | 3,95                       | 6,6                       | 16,1     | 2,65                  | 13,45                      | 8,1                       | 12,9     | 2,65                  | 10,25                      | 20,0                      |
| H3      | 16,4     | 4,35                  | 12,05                      | 16,4                      | 32,5     | 4,35                  | 28,15                      | 27,7                      | 18,3     | 4,35                  | 13,95                      | 27,0                      |
| H5      | 24,9     | 4,16                  | 20,74                      | 24,9                      | 55,1     | 4,16                  | 50,94                      | 34,8                      | 25,5     | 4,16                  | 21,34                      | 32,6                      |

[a]  $\delta^{\text{para}} = \delta - \delta^{\text{dia}}$ . The values for  $\delta^{\text{dia}}$  was taken from the diamagnetic representative within this series, i.e. **1-La**. [b] Averaged value for the H atoms of the Me-group.

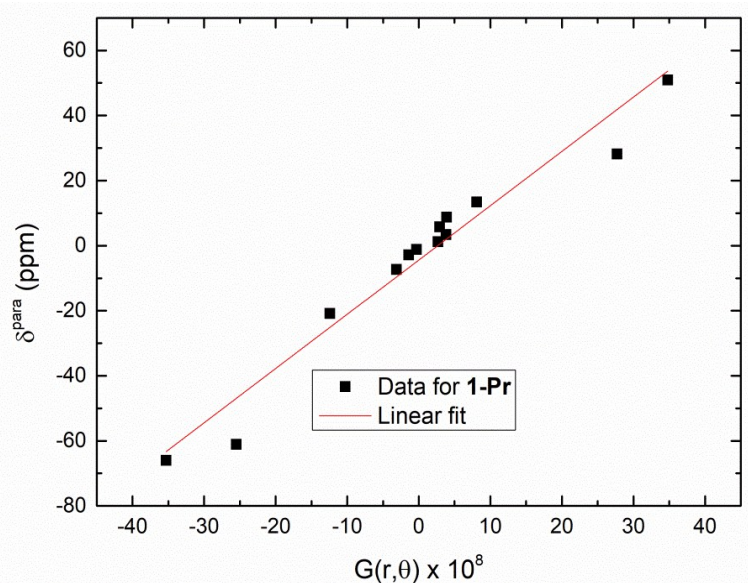**Figure S6.** Correlation between  $\delta^{\text{para}}$  and  $G(r,\theta) = (3 \cos^2\theta - 1)/r^3$  for compound **1-Pr**.

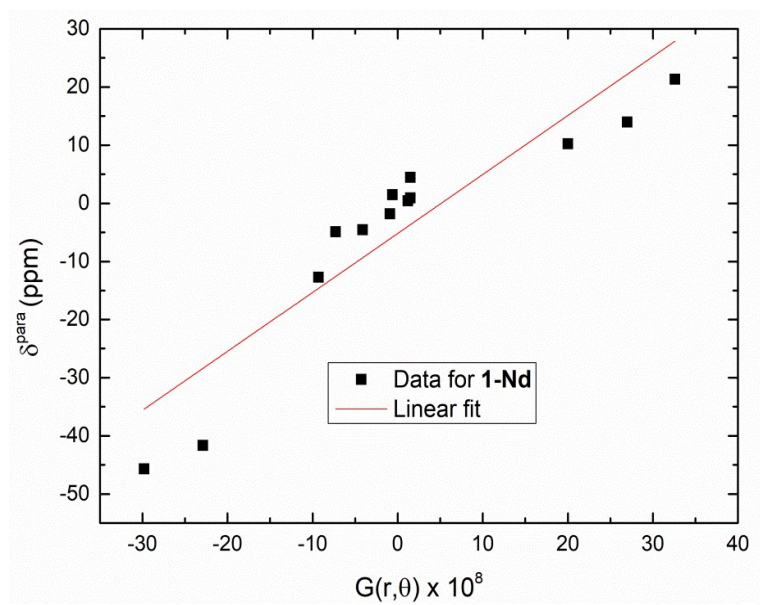

**Figure S7.** Correlation between  $\delta^{\text{para}}$  and  $G(r, \theta) = (3 \cos^2 \theta - 1)/r^3$  for compound **1-Nd**.
